# Supplementary material for: Specific Phospholipid Modulation by Muscarinic Signaling in a Rat Lesion Model of Alzheimer’s Disease
Source: PubMed Central journal article supplement (PMC9162383; doi:10.1021/acschemneuro.1c00169), 2021-05-26
Supplement: cn1c00169_si_001.pdf [file cn1c00169_si_001.pdf]

## Supporting information

# Specific Phospholipid Modulation by Muscarinic Signaling in a Rat Lesion Model of Alzheimer's Disease

Alberto Llorente-Ovejero<sup>1</sup>, Jonatan Martínez-Gardeazabal<sup>1</sup>, Marta Moreno-Rodríguez<sup>1</sup>, Laura Lombardero<sup>1</sup>, Estíbaliz González de San Román<sup>1</sup>, Iván Manuel<sup>1,2</sup>, María Teresa Giralt<sup>1</sup>, Rafael Rodríguez-Puertas<sup>1,2 \*</sup>

<sup>1</sup>*Department of Pharmacology, Faculty of Medicine and Nursing. University of the Basque Country (UPV/EHU), B° Sarriena s/n, 48940 Leioa, Spain.*

<sup>2</sup>*Neurodegenerative Diseases, BioCruces Bizkaia Health Research Institute, Barakaldo, Spain.*

**Table S1.** Relative intensity of representative lipid species which have been found to be modified in the NBM and cortex of vehicle (aCSF) and 192IgG-saporin treated rats, in both positive and negative ion mode.

| Assignment                                            | Cal m/z  | Exp m/z  | % Intensity <sup>[1]</sup> |                       |              |                      |  |
|-------------------------------------------------------|----------|----------|----------------------------|-----------------------|--------------|----------------------|--|
|                                                       |          |          | aCSF                       | NBM                   |              | Cortex               |  |
|                                                       |          |          |                            | SAP                   | aCSF         | SAP                  |  |
| <b>Positive ion mode</b>                              |          |          |                            |                       |              |                      |  |
| PE (14:1/20:4) + H <sup>+</sup>                       | 710.4755 | 710.4893 | 15.21 ± 0.70               | <b>11.87 ± 1.38*</b>  | 9.97 ± 0.62  | <b>10.67 ± 0.67</b>  |  |
| SM (d18:1/18:0) + H <sup>+</sup>                      | 731.6061 | 731.6070 | 7.11 ± 1.13                | <b>4.15 ± 0.80*</b>   | 4.19 ± 0.44  | <b>3.50 ± 0.53</b>   |  |
| SM (d18:1/16:0) + K <sup>+</sup>                      | 741.5313 | 741.5311 | 0.96 ± 0.14                | <b>10.63 ± 3.33**</b> | 0.55 ± 0.13  | <b>0.78 ± 0.11</b>   |  |
| PC (32:0)+Na <sup>+</sup> /PC (34:3) + H <sup>+</sup> | 756.5514 | 756.5520 | 15.75 ± 1.23               | <b>21.94 ± 2.46*</b>  | 16.94 ± 1.02 | <b>17.41 ± 1.31</b>  |  |
| PC (34:2)+Na <sup>+</sup> /PC (36:5) + H <sup>+</sup> | 780.5514 | 780.5521 | 0.85 ± 0.09                | <b>2.02 ± 0.27**</b>  | 1.10 ± 0.08  | <b>1.07 ± 0.08</b>   |  |
| PC (34:1)+Na <sup>+</sup> /PC (36:4) + H <sup>+</sup> | 782.5670 | 782.5673 | 32.75 ± 1.65               | <b>46.10 ± 3.86**</b> | 32.31 ± 1.64 | <b>30.9 ± 1.29</b>   |  |
| PC (34:2) + K <sup>+</sup>                            | 796.5253 | 796.5255 | 3.27 ± 0.17                | <b>5.2 ± 0.30***</b>  | 4.20 ± 0.15  | <b>4.16 ± 0.07</b>   |  |
| PC (34:1) + K <sup>+</sup>                            | 798.5410 | 798.5405 | 100 ± 0                    | <b>100 ± 0</b>        | 100 ± 0      | <b>100 ± 0</b>       |  |
| PC (36:4)+Na <sup>+</sup> /PC (38:7) + H <sup>+</sup> | 804.5514 | 804.5510 | 2.79 ± 0.31                | <b>7.69 ± 1.52*</b>   | 3.63 ± 0.31  | <b>4.3 ± 0.24</b>    |  |
| PC (36:1)+Na <sup>+</sup> /PC (38:4) + H <sup>+</sup> | 810.5983 | 810.5984 | 14.62 ± 0.30               | <b>21.64 ± 1.53**</b> | 10.62 ± 0.48 | <b>8.95 ± 0.63*</b>  |  |
| PC (36:4) + K <sup>+</sup>                            | 820.5253 | 820.5249 | 10.32 ± 1.01               | <b>18.61 ± 2.71*</b>  | 13.17 ± 0.99 | <b>15.63 ± 0.48*</b> |  |
| PC (38:4)+Na <sup>+</sup> /PC (40:7) + H <sup>+</sup> | 832.5827 | 832.5826 | 3.00 ± 0.30                | <b>7.98 ± 1.40**</b>  | 2.82 ± 0.25  | <b>3.11 ± 0.21</b>   |  |
| PC (38:4)+K <sup>+</sup> /PC (42:9) + H <sup>+</sup>  | 848.5566 | 848.5560 | 10.23 ± 0.93               | <b>18.27 ± 2.15**</b> | 9.71 ± 0.80  | <b>10.75 ± 0.38</b>  |  |
| PC (40:6) + Na <sup>+</sup>                           | 856.5827 | 856.5820 | 0.88 ± 0.17                | <b>2.25 ± 0.40**</b>  | 0.75 ± 0.11  | <b>1.14 ± 0.09*</b>  |  |
| <b>Negative ion mode</b>                              |          |          |                            |                       |              |                      |  |
| SM (d18:1/15:0) - H <sup>-</sup>                      | 687.5447 | 687.5443 | 1.26 ± 0.24                | <b>6.44 ± 1.50**</b>  | 0.94 ± 0.23  | <b>1.52 ± 0.28</b>   |  |
| PS (18:0/18:1) - H <sup>-</sup>                       | 788.5447 | 788.5447 | 11.04 ± 2.16               | <b>3.95 ± 0.99**</b>  | 8.54 ± 1.28  | <b>6.30 ± 0.85</b>   |  |
| PE (40:4)/PC (18:0/20:4) - H <sup>-</sup>             | 794.5705 | 794.5705 | 0.82 ± 0.13                | <b>1.35 ± 0.17*</b>   | 0.83 ± 0.08  | <b>0.98 ± 0.14</b>   |  |
| PG (22:6/22:6) - H <sup>-</sup>                       | 865.5025 | 865.5033 | 0.06 ± 0.01                | <b>0.86 ± 0.24**</b>  | 0.04 ± 0.01  | <b>0.16 ± 0.05*</b>  |  |

<sup>[1]</sup> The maximal peak is the most intense peak of the lipid spectrum, in this case PC (34:1) in positive and PI (20:4/18:0) in negative ion modes, which are set at 100%. Data are mean ± S.E.M values of aCSF (n = 8) and 192IgG-saporin-treated (n = 8) rats. \*p < 0.05, \*\*p < 0.01 and \*\*\*p < 0.001 when compared to aCSF group. PC: phosphatidylcholine; SM: sphingomyelin; PS: phosphatidylserine; PE: phosphatidylethanolamine; PG: phosphoglycerol; PI: phosphatidylinositol; Cal: calculated; Exp: experimental.

**Table S2.** [<sup>35</sup>S]GTP<sub>γ</sub>S basal and carbachol-induced (100 μM) binding in cortical, hippocampal and several brain regions of vehicle (aCSF) and 192IgG-saporin-treated rats.

| Brain region                               | Basal binding<br>(nCi/g t.e.) |          | Carbachol stimulation<br>(% Over basal) |                   |
|--------------------------------------------|-------------------------------|----------|-----------------------------------------|-------------------|
|                                            | aCSF                          | SAP      | aCSF                                    | SAP               |
| <b>Cerebral cortex</b>                     |                               |          |                                         |                   |
| Cingulate                                  | 304 ± 26                      | 306 ± 20 | <b>52 ± 12.1</b>                        | <b>48 ± 6.7</b>   |
| Ectorhinal                                 | 352 ± 34                      | 290 ± 29 | <b>66 ± 12.5</b>                        | <b>58 ± 8.0</b>   |
| Entorhinal                                 | 342 ± 35                      | 335 ± 36 | <b>76 ± 10.5</b>                        | <b>93 ± 11.6</b>  |
| Perirhinal                                 | 338 ± 49                      | 309 ± 29 | <b>35 ± 5.8</b>                         | <b>43 ± 3.5</b>   |
| Somatosensory                              | 355 ± 28                      | 333 ± 20 | <b>31 ± 7.0</b>                         | <b>54 ± 10.6</b>  |
| Motor                                      | 311 ± 33                      | 319 ± 20 | <b>40 ± 13.3</b>                        | <b>66 ± 6.5</b>   |
| <b>Hippocampus</b>                         |                               |          |                                         |                   |
| CA1                                        |                               |          |                                         |                   |
| Oriens                                     | 320 ± 40                      | 269 ± 32 | <b>26 ± 9.4</b>                         | <b>40 ± 10.4</b>  |
| Pyramidal                                  | 527 ± 64                      | 457 ± 50 | <b>40 ± 11.5</b>                        | <b>30 ± 6.2</b>   |
| Radiatum                                   | 363 ± 33                      | 323 ± 36 | <b>45 ± 11.5</b>                        | <b>42 ± 9.0</b>   |
| CA3                                        |                               |          |                                         |                   |
| Oriens                                     | 317 ± 26                      | 303 ± 38 | <b>26 ± 8.0</b>                         | <b>48 ± 6.6</b>   |
| Pyramidal                                  | 477 ± 36                      | 453 ± 42 | <b>11 ± 5.6</b>                         | <b>32 ± 4.2*</b>  |
| Radiatum                                   | 328 ± 21                      | 281 ± 32 | <b>28 ± 9.5</b>                         | <b>40 ± 13.0</b>  |
| Dentate gyrus                              |                               |          |                                         |                   |
| Granular                                   | 467 ± 29                      | 452 ± 50 | <b>24 ± 6.1</b>                         | <b>48 ± 9.7*</b>  |
| Molecular                                  | 315 ± 49                      | 278 ± 45 | <b>34 ± 14.7</b>                        | <b>34 ± 9.5</b>   |
| <i>Mesencephalon</i>                       |                               |          |                                         |                   |
| Periaqueductal gray                        | 496 ± 44                      | 469 ± 45 | <b>51 ± 15.0</b>                        | <b>47 ± 8.5</b>   |
| Substantia nigra                           | 456 ± 52                      | 399 ± 38 | <b>31 ± 10.5</b>                        | <b>37 ± 5.4</b>   |
| <b>Basal ganglia/cholinergic forebrain</b> |                               |          |                                         |                   |
| Globus pallidus                            | 335 ± 43                      | 347 ± 36 | <b>46 ± 13.2</b>                        | <b>49 ± 12.5</b>  |
| Striatum                                   | 339 ± 26                      | 345 ± 21 | <b>74 ± 15.4</b>                        | <b>62 ± 11.1</b>  |
| NBM                                        | 535 ± 49                      | 398 ± 31 | <b>43 ± 9.2</b>                         | <b>11 ± 7.5*</b>  |
| Horiz. diagonal band                       | 310 ± 25                      | 327 ± 31 | <b>121 ± 20.7</b>                       | <b>115 ± 17.6</b> |
| Vertical diagonal band                     | 330 ± 25                      | 399 ± 42 | <b>135 ± 24.1</b>                       | <b>113 ± 23.2</b> |
| Medial septum                              | 267 ± 24                      | 284 ± 32 | <b>152 ± 24.4</b>                       | <b>139 ± 23.7</b> |

Data are mean ± S.E. M values of aCSF (n = 9) and SAP (n = 11) treated rats.

\* p < 0.05, when compared to aCSF group.

**Table S3.** [<sup>35</sup>S]GTP $\gamma$ S basal and carbachol-induced (100  $\mu$ M) binding in the different amygdaloid nuclei and several brain regions of vehicle (aCSF) and 192IgG-saporin-treated rats.

| Brain region             | Basal binding<br>(nCi/g t.e.) |              | Carbachol stimulation<br>(% Over basal) |                                  |
|--------------------------|-------------------------------|--------------|-----------------------------------------|----------------------------------|
|                          | aCSF                          | SAP          | aCSF                                    | SAP                              |
| <i>Telencephalon</i>     |                               |              |                                         |                                  |
| <b>Amygdaloid nuclei</b> |                               |              |                                         |                                  |
| Anterior                 | 421 $\pm$ 33                  | 402 $\pm$ 29 | <b>59 <math>\pm</math> 9.1</b>          | <b>47 <math>\pm</math> 13.6</b>  |
| Basolateral              | 487 $\pm$ 47                  | 390 $\pm$ 44 | <b>43 <math>\pm</math> 6.6</b>          | <b>48 <math>\pm</math> 10.9</b>  |
| Central                  | 710 $\pm$ 91                  | 525 $\pm$ 55 | <b>27 <math>\pm</math> 9.2</b>          | <b>52 <math>\pm</math> 7.8</b>   |
| Lateral                  | 483 $\pm$ 50                  | 425 $\pm$ 43 | <b>41 <math>\pm</math> 9.3</b>          | <b>36 <math>\pm</math> 7.2</b>   |
| Medial                   | 720 $\pm$ 94                  | 621 $\pm$ 69 | <b>39 <math>\pm</math> 8.5</b>          | <b>34 <math>\pm</math> 4.7</b>   |
| Ventral subiculum        | 345 $\pm$ 29                  | 294 $\pm$ 18 | <b>37 <math>\pm</math> 4.8</b>          | <b>47 <math>\pm</math> 6.7</b>   |
| <i>Rhinencephalon</i>    |                               |              |                                         |                                  |
| Lat olfactory tract      | 379 $\pm$ 45                  | 324 $\pm$ 37 | <b>82 <math>\pm</math> 13.1</b>         | <b>47 <math>\pm</math> 11.5</b>  |
| <i>Midbrain</i>          |                               |              |                                         |                                  |
| AV thalamic nucleus      | 425 $\pm$ 32                  | 397 $\pm$ 41 | <b>232 <math>\pm</math> 17.4</b>        | <b>251 <math>\pm</math> 28.6</b> |
| Gray sup colliculus      | 341 $\pm$ 27                  | 362 $\pm$ 36 | <b>197 <math>\pm</math> 15.4</b>        | <b>211 <math>\pm</math> 19.9</b> |
| <i>Rhomboencephalon</i>  |                               |              |                                         |                                  |
| Dorsal raphe             | 703 $\pm$ 103                 | 590 $\pm$ 74 | <b>19 <math>\pm</math> 4.9</b>          | <b>24 <math>\pm</math> 4.7</b>   |
| Locus coeruleus          | 220 $\pm$ 36                  | 132 $\pm$ 16 | <b>26 <math>\pm</math> 11.9</b>         | <b>78 <math>\pm</math> 11.9</b>  |

Data are mean  $\pm$  S.E. M values of aCSF (n = 9) and SAP (n = 11) treated rats.

**Table S4.** [<sup>35</sup>S]GTP $\gamma$ S basal and carbachol-induced (100  $\mu$ M) binding in different regions of grey matter from SHAM-operated rats.

|                      | Basal binding<br>(nCi/g t.e.) | Carbachol stimulation<br>(% Over basal) |                         | Basal binding<br>(nCi/g t.e.) | Carbachol stimulation<br>(% Over basal) |
|----------------------|-------------------------------|-----------------------------------------|-------------------------|-------------------------------|-----------------------------------------|
| <b>Brain region</b>  |                               |                                         | <b>Brain region</b>     |                               |                                         |
| <i>Telencephalon</i> |                               |                                         | <b>Cerebral cortex</b>  |                               |                                         |
| <b>Amygdala</b>      |                               |                                         | Cingulate               | 354 $\pm$ 30                  | <b>43 <math>\pm</math> 12.7</b>         |
| Anterior             | 403 $\pm$ 33                  | <b>37 <math>\pm</math> 14.4</b>         | Ectorhinal              | 337 $\pm$ 56                  | <b>36 <math>\pm</math> 6.5</b>          |
| Basolateral          | 387 $\pm$ 41                  | <b>53 <math>\pm</math> 10.5</b>         | Entorhinal              | 308 $\pm$ 30                  | <b>47 <math>\pm</math> 7.1</b>          |
| Central              | 536 $\pm$ 53                  | <b>32 <math>\pm</math> 8.39</b>         | Perirhinal              | 309 $\pm$ 43                  | <b>36 <math>\pm</math> 13.5</b>         |
| Lateral              | 373 $\pm$ 53                  | <b>78 <math>\pm</math> 16.9</b>         | Piriform                | 270 $\pm$ 31                  | <b>61 <math>\pm</math> 9.8</b>          |
| Medial               | 672 $\pm$ 84                  | <b>34 <math>\pm</math> 11.7</b>         | Somatosensory           | 368 $\pm$ 28                  | <b>34 <math>\pm</math> 4.9</b>          |
| <b>Hippocampus</b>   |                               |                                         | Motor                   | 353 $\pm$ 37                  | <b>34 <math>\pm</math> 14.8</b>         |
| CA1                  |                               |                                         | <b>Basal ganglia</b>    |                               |                                         |
| Oriens               | 252 $\pm$ 25                  | <b>27 <math>\pm</math> 12.0</b>         | Globus pallidus         | 275 $\pm$ 25                  | <b>54 <math>\pm</math> 12.2</b>         |
| Pyramidal            | 366 $\pm$ 44                  | <b>55 <math>\pm</math> 15.6</b>         | Striatum                | 330 $\pm$ 37                  | <b>85 <math>\pm</math> 14.0</b>         |
| Radiatum             | 279 $\pm$ 19                  | <b>42 <math>\pm</math> 9.8</b>          | <i>Diencephalon</i>     |                               |                                         |
| CA3                  |                               |                                         | NBM                     | 492 $\pm$ 51                  | <b>47 <math>\pm</math> 12.3</b>         |
| Oriens               | 280 $\pm$ 44                  | <b>21 <math>\pm</math> 6.8</b>          | Horiz diag band         | 356 $\pm$ 29                  | <b>115 <math>\pm</math> 19.5</b>        |
| Pyramidal            | 419 $\pm$ 52                  | <b>9 <math>\pm</math> 6.2</b>           | Vertical diag band      | 366 $\pm$ 28                  | <b>112 <math>\pm</math> 25.6</b>        |
| Radiatum             | 264 $\pm$ 38                  | <b>40 <math>\pm</math> 19.8</b>         | Medial septum           | 280 $\pm$ 50                  | <b>150 <math>\pm</math> 41.2</b>        |
| Dentate gyrus        |                               |                                         | <i>Rhinencephalon</i>   |                               |                                         |
| Granular             | 437 $\pm$ 32                  | <b>25 <math>\pm</math> 1.2</b>          | Lat olfactory tract     | 356 $\pm$ 27                  | <b>41 <math>\pm</math> 9.8</b>          |
| Molecular            | 263 $\pm$ 45                  | <b>44 <math>\pm</math> 9.2</b>          | <i>Rhomboencephalon</i> |                               |                                         |
| Polimorphic          | 290 $\pm$ 39                  | <b>28 <math>\pm</math> 15.7</b>         | Dorsal raphe            | 533 $\pm$ 99                  | <b>42 <math>\pm</math> 9.4</b>          |
| Vent subic           | 301 $\pm$ 35                  | <b>49 <math>\pm</math> 11.4</b>         | Locus coeruleus         | 197 $\pm$ 30                  | <b>52 <math>\pm</math> 6.0</b>          |
| <i>Brainstem</i>     |                               |                                         | <i>Mesencephalon</i>    |                               |                                         |
| Spinal trig N        | 178 $\pm$ 25                  | <b>87 <math>\pm</math> 19.8</b>         | Periaqueduc gray        | 450 $\pm$ 82                  | <b>47 <math>\pm</math> 10.3</b>         |
|                      |                               |                                         | Substantia nigra        | 361 $\pm$ 56                  | <b>32 <math>\pm</math> 14.9</b>         |

Data are mean  $\pm$  S.E. M values of SHAM-operated (n = 6) rats.

**Table S5.** [<sup>3</sup>H]-pirenzepine and [<sup>3</sup>H]-oxotremorine binding in different brain regions of vehicle (aCSF) and 192IgG-saporin-treated rats.

| <b>[<sup>3</sup>H]-pirenzepine binding<br/>(fmol/mg t.e.)</b> |             |                     | <b>[<sup>3</sup>H]-oxotremorine binding<br/>(fmol/mg t.e.)</b> |             |                     |
|---------------------------------------------------------------|-------------|---------------------|----------------------------------------------------------------|-------------|---------------------|
| <b>Brain region</b>                                           | <b>aCSF</b> | <b>SAP</b>          | <b>Brain region</b>                                            | <b>aCSF</b> | <b>SAP</b>          |
| <b>Amygdala</b>                                               |             |                     | <b>Amygdala</b>                                                |             |                     |
| Anterior                                                      | 7.3 ± 0.8   | <b>3.6 ± 0.9*</b>   | Anterior                                                       | 21.2 ± 2.7  | <b>31.1 ± 1.9</b>   |
| Basolateral                                                   | 70.2 ± 5.9  | <b>74.5 ± 4.8</b>   | Basolateral                                                    | 5.2 ± 1.7   | <b>5.1 ± 1.8</b>    |
| Central                                                       | 30.5 ± 3.6  | <b>37.6 ± 6.6</b>   | Lateral                                                        | 5.4 ± 1.1   | <b>5.3 ± 1.6</b>    |
| Lateral                                                       | 66.1 ± 6.2  | <b>66.1 ± 4.8</b>   | <b>Hippocampus</b>                                             |             |                     |
| <b>Hippocampus</b>                                            |             |                     | CA1                                                            |             |                     |
| CA1                                                           | 111.3 ± 10  | <b>131.8 ± 8.8</b>  | Pyramidal                                                      | 6.2 ± 1.5   | <b>7.5 ± 2.2</b>    |
| Oriens                                                        | 114.8 ± 10  | <b>126.1 ± 4.2</b>  | CA3                                                            |             |                     |
| Pyramidal                                                     | 127.9 ± 9.7 | <b>134.9 ± 7.9</b>  | Pyramidal                                                      | 11.0 ± 2.3  | <b>11.3 ± 2.6</b>   |
| Radiatum                                                      | 120.6 ± 8.6 | <b>136.2 ± 7.7</b>  | Dentate gyrus                                                  |             |                     |
| CA3                                                           | 58.2 ± 6.6  | <b>64.1 ± 2.5</b>   | Granular                                                       | 3.6 ± 1.5   | <b>7.1 ± 1.7</b>    |
| Oriens                                                        | 43.4 ± 3.4  | <b>58.3 ± 2.3**</b> | <b>Midbrain</b>                                                |             |                     |
| Pyramidal                                                     | 43.4 ± 4.5  | <b>53.5 ± 4.1</b>   | AV thalamic nucleus                                            | 66.3 ± 4.4  | <b>62.1 ± 2.7</b>   |
| Radiatum                                                      | 49.5 ± 3.6  | <b>58.2 ± 3.6</b>   | Gray sup colliculus                                            | 57.8 ± 2.9  | <b>72.9 ± 4.5*</b>  |
| Dentate gyrus                                                 | 108.1 ± 4.5 | <b>129.3 ± 5.0*</b> | Opt sup colliculus                                             | 28.8 ± 5.3  | <b>31.3 ± 6.2</b>   |
| Granular                                                      | 34.4 ± 2.5  | <b>46.4 ± 2.0*</b>  | <b>Cerebral cortex</b>                                         |             |                     |
| Molecular                                                     | 106.3 ± 8.8 | <b>114.9 ± 7.1</b>  | Cingulate                                                      | 11.2 ± 2.3  | <b>17.9 ± 1.6*</b>  |
| Polimorphic                                                   | 74.9 ± 5.5  | <b>79.7 ± 4.2</b>   | Ectorhinal                                                     | 10.0 ± 2.1  | <b>14.6 ± 1.4</b>   |
| <b>Cerebral cortex</b>                                        |             |                     | Perirhinal                                                     | 6.9 ± 2.3   | <b>10.7 ± 1.2</b>   |
| Cingulate                                                     | 38.2 ± 1.0  | <b>36.1 ± 2.1</b>   | Motor                                                          |             |                     |
| Ectorhinal                                                    | 58.5 ± 5.5  | <b>54.6 ± 2.9</b>   | Layer I-II                                                     | 19.6 ± 2.6  | <b>26.5 ± 2.1</b>   |
| Entorhinal                                                    | 51.4 ± 4.6  | <b>47.6 ± 3.7</b>   | Layer V-VI                                                     | 12.7 ± 3.0  | <b>21.8 ± 2.4*</b>  |
| Perirhinal                                                    | 55.2 ± 4.7  | <b>54.6 ± 3.0</b>   | Somatosensory                                                  |             |                     |
| Motor                                                         | 39.5 ± 3.1  | <b>36.9 ± 1.3</b>   | Layer I-II                                                     | 22.9 ± 1.1  | <b>29.7 ± 2.5</b>   |
| Somatosensory                                                 | 43.7 ± 2.6  | <b>43.9 ± 2.6</b>   | Layer V-VI                                                     | 12.2 ± 2.0  | <b>20.3 ± 2.5*</b>  |
| <b>Basal ganglia/cholinergic forebrain</b>                    |             |                     | <b>Basal ganglia/cholinergic forebrain</b>                     |             |                     |
| Striatum                                                      | 62.1 ± 6.1  | <b>63.8 ± 3.2</b>   | Striatum                                                       | 8.2 ± 1.9   | <b>10.0 ± 1.5</b>   |
| Globus pallidus                                               | 5.0 ± 0.7   | <b>3.3 ± 0.5</b>    | Medial septum                                                  | 30.1 ± 1.7  | <b>31.2 ± 3.6</b>   |
| NBM                                                           | 5.4 ± 1.4   | <b>4.5 ± 0.7</b>    | NBM                                                            | 7.2 ± 0.6   | <b>3.1 ± 0.4***</b> |

Data are mean ± S.E. M values of aCSF (n = 7) and SAP (n = 9) treated rats.

\* p < 0.05, \*\* p < 0.01, \*\*\* p < 0.001 when compared to aCSF group.

**Table S6.** Absolute intensity of lipid species in organotypic cultures after treatments in both positive and negative ion mode.

| Assignment                                             | Cal <i>m/z</i> | Exp <i>m/z</i> | Intensity (u.a.)                         |                                                        |                                         |                                                        |
|--------------------------------------------------------|----------------|----------------|------------------------------------------|--------------------------------------------------------|-----------------------------------------|--------------------------------------------------------|
|                                                        |                |                | VEHICLE                                  | CARBACHOL                                              | CAR+SCOP                                | CAR+PIR                                                |
| <b>Positive ion mode</b>                               |                |                |                                          |                                                        |                                         |                                                        |
| LPC (16:0) + H <sup>+</sup>                            | 496.3398       | 496.3379       | 1.71·10 <sup>9</sup> ± 224629            | <b>4.7·10<sup>9</sup></b> ± <b>6·10<sup>5</sup>*a</b>  | 3.1·10 <sup>9</sup> ± 1·10 <sup>5</sup> | <b>4.25E+09</b> ± <b>6·10<sup>5</sup>*b</b>            |
| LPC (16:1) + H <sup>+</sup>                            | 494.3241       | 494.3270       | 3809. ± 461                              | <b>11696.00</b> ± <b>2506*a</b>                        | 5400.00 ± 1336                          | <b>7250.00</b> ± <b>2101</b>                           |
| LPC (18:0) + H <sup>+</sup>                            | 524.3744       | 524.3711       | 910345 ± 166700                          | <b>5.52·10<sup>9</sup></b> ± <b>5·10<sup>5</sup>*a</b> | 4. ·10 <sup>9</sup> ± 2·10 <sup>5</sup> | <b>5.2·10<sup>9</sup></b> ± <b>6·10<sup>5</sup>*b</b>  |
| LPC (O-18:0) + H <sup>+</sup>                          | 508.3761       | 508.3788       | 6580 ± 864                               | <b>18654</b> ± <b>2098**a</b>                          | 10133 ± 840                             | <b>15956</b> ± <b>1373*b</b>                           |
| LPC (O-18:1) + H <sup>+</sup>                          | 506.3594       | 506.3605       | 8.84·10 <sup>4</sup> ± 13851             | <b>1.39·10<sup>9</sup></b> ± <b>2·10<sup>5</sup>*a</b> | 9.5·10 <sup>5</sup> ± 1·10 <sup>5</sup> | <b>1.4·10<sup>9</sup></b> ± <b>1·10<sup>5</sup>*b</b>  |
| PC (36:4) + H <sup>+</sup>                             | 782.5694       | 782.5727       | 9.29·10 <sup>9</sup> ± 1·10 <sup>9</sup> | <b>5.89·10<sup>9</sup></b> ± <b>3·10<sup>5</sup>*a</b> | 7.1·10 <sup>9</sup> ± 2·10 <sup>5</sup> | <b>5.8·10<sup>9</sup></b> ± <b>2·10<sup>5</sup>**b</b> |
| PC (O-36:4) + H <sup>+</sup>                           | 768.5902       | 768.5943       | 173714 ± 7706                            | <b>54424</b> ± <b>9721*a</b>                           | 146795 ± 6801                           | <b>69580</b> ± <b>12002*b</b>                          |
| PC (36:5) + Na <sup>+</sup>                            | 802.5357       | 802.5401       | 44361 ± 1268                             | <b>23056</b> ± <b>3204</b>                             | 35767 ± 6284                            | <b>14701</b> ± <b>3088**b</b>                          |
| PC (38:5) + H <sup>+</sup>                             | 808.5851       | 808.5861       | 761567 ± 42629                           | <b>526654</b> ± <b>21651*a</b>                         | 700222 ± 63349                          | <b>568492</b> ± <b>48686</b>                           |
| PC (38:6) + H <sup>+</sup>                             | 806.5694       | 806.5742       | 764787 ± 81976                           | <b>349308</b> ± <b>23788**a</b>                        | 481258 ± 32195                          | <b>349138</b> ± <b>4729*b</b>                          |
| PC(38:7) + H <sup>+</sup>                              | 804.5565       | 804.5538       | 597052 ± 100617                          | <b>270280</b> ± <b>26512*a</b>                         | 402153 ± 59147                          | <b>248105</b> ± <b>40459*b</b>                         |
| PC(O-38:7) + H <sup>+</sup>                            | 790.5745       | 790.5795       | 63971 ± 5613                             | <b>26141</b> ± <b>4941*a</b>                           | 64351 ± 9306                            | <b>30403</b> ± <b>4465</b>                             |
| PC(40:7) + Na <sup>+</sup> /PC (36:4) + H <sup>+</sup> | 832.5851       | 832.5851       | 288228 ± 24796*                          | <b>197092</b> ± <b>19490</b>                           | 282757 ± 21872                          | <b>185810</b> ± <b>35558</b>                           |
| <b>Negative ion mode</b>                               |                |                |                                          |                                                        |                                         |                                                        |
| LPC (O-18:0) -CH <sub>3</sub>                          | 508.3409       | 508.3418       | 3997 ± 1106                              | <b>18226</b> ± <b>1697*a</b>                           | 11564 ± 1505                            | <b>20301</b> ± <b>3041**b</b>                          |

The maximal peak in negative ion mode, PI (20:4/18:0), changed with treatments. Data are mean ± S.E.M values of absolute intensity of VEHICLE (n = 6), CARBACHOL (n = 4), CAR+SCOP: Carbachol+Scopolamine (n = 4), and CAR+PIR: Carbachol+Pirenzepine (n = 4) of absolute intensity. \*p < 0.05, \*\*p < 0.01. **a\*** when compared VEHICLE vs CARBACHOL. **b\*** when compared VEHICLE vs CAR+PIR. PC: phosphatidylcholine; LPC: phosphatidylcholine; Cal: calculated; Exp: experimental.
